# Supplementary material for: Aggregate Sustainability Indices in the Electricity Sector: A Review
Source: Research Square preprint supplement (doi:10.21203/rs.3.rs-7395096/v1), 2025-11-06
Supplement: Supplementary file 2 [file e316b0b43d5449b21df1545e.pdf]

**Table S3 - Quality Assessment of Reviewed Studies on Composite Sustainability Indices in the Electricity and Energy Sector**

*1 - Very Weak*

*5 - Very Good*

| Author name(year)        | Methodology summary                                                                                         | Indicator<br>Transparency | Data<br>Reliability | Missing-Data<br>Handling | Stakeholder<br>Involvement | Total  |
|--------------------------|-------------------------------------------------------------------------------------------------------------|---------------------------|---------------------|--------------------------|----------------------------|--------|
| Prokhorova et al. (2024) | Combined indicative, AHP, expert system for energy safety in Ukrainian power plant.                         | 4                         | 3                   | 3                        | 4                          | 14 /20 |
| Cavallaro (2015)         | Fuzzy inference (Mamdani); uses linguistic variables to evaluate environmental pressure of generation tech. | 4                         | 3                   | 5                        | 3                          | 15 /20 |
| Qian et al. (2024)       | EEBD-3ES model integrating AHP + entropy; national–provincial socio-economic impacts.                       | 5                         | 5                   | 4                        | 4                          | 18 /20 |

|                        |                                                                                                          |   |   |   |   |        |
|------------------------|----------------------------------------------------------------------------------------------------------|---|---|---|---|--------|
| Neofytou et al. (2020) | PROMETHEE + AHP hybrid for 14 EU countries; social, political, technological readiness.                  | 5 | 4 | 4 | 5 | 18 /20 |
| Raza et al. (2014)     | MCDA weighted-sum for battery vs fuel-cell storage sustainability.                                       | 3 | 4 | 3 | 3 | 13 /20 |
| Goldrath et al. (2015) | Combined sustainability index (environmental, tech, econ, social, political) for electricity efficiency. | 5 | 4 | 3 | 4 | 16 /20 |
| Liu (2014)             | Review + conceptual GSI framework; fuzzy AHP and weighted aggregation.                                   | 5 | 5 | 4 | 2 | 16 /20 |
| Wang et al. (2020)     | Multi-level fuzzy evaluation for integrated systems reliability; AHP + entropy combination.              | 4 | 4 | 5 | 3 | 16 /20 |

|                  |                                                                                                                                                                                                                                    |   |   |   |   |        |
|------------------|------------------------------------------------------------------------------------------------------------------------------------------------------------------------------------------------------------------------------------|---|---|---|---|--------|
| Wu et al. (2021) | Improved TOPSIS + entropy weighting for low-carbon transition performance.                                                                                                                                                         | 5 | 5 | 4 | 3 | 17 /20 |
| Raza et al.      | Early version of sustainability index approach.                                                                                                                                                                                    | 3 | 3 | 3 | 3 | 12 /20 |
| Afgan (2010)     | Introduces a Sustainability Paradigm for Intelligent Energy Systems using a multi-criteria aggregation method combining economic, environmental, social, and resource indicators. ICT used for monitoring & resilience evaluation. | 4 | 4 | 3 | 3 | 14 /20 |

|                          |                                                                                                                                                               |   |   |   |   |        |
|--------------------------|---------------------------------------------------------------------------------------------------------------------------------------------------------------|---|---|---|---|--------|
| Cucchiella et al. (2017) | Develops an AHP–MCDA model to create a sustainability index comparing 28 EU countries using Eurostat data (2012–2013) across 9 energy–environment indicators. | 5 | 5 | 5 | 4 | 19 /20 |
|--------------------------|---------------------------------------------------------------------------------------------------------------------------------------------------------------|---|---|---|---|--------|

|                                                |                                                                                                                                                                                                                                                                                                                                                                  |          |          |          |          |               |
|------------------------------------------------|------------------------------------------------------------------------------------------------------------------------------------------------------------------------------------------------------------------------------------------------------------------------------------------------------------------------------------------------------------------|----------|----------|----------|----------|---------------|
| <p>Torul Yürek, Özyörük &amp; Özcan (2024)</p> | <p>Integrates Multi-Objective Linear Programming (MOLP) with Pythagorean Fuzzy AHP–TOPSIS for Turkey’s 2022–2030 energy portfolio optimization. Considers 13 generation alternatives including hybrid and battery systems. Objectives: minimize cost, maximize sustainability index (SI) and socio-political index (SPI), and balance technical feasibility.</p> | <p>5</p> | <p>5</p> | <p>4</p> | <p>4</p> | <p>18 /20</p> |
|------------------------------------------------|------------------------------------------------------------------------------------------------------------------------------------------------------------------------------------------------------------------------------------------------------------------------------------------------------------------------------------------------------------------|----------|----------|----------|----------|---------------|

|                               |                                                                                                                                                                                                                                     |   |   |   |   |         |
|-------------------------------|-------------------------------------------------------------------------------------------------------------------------------------------------------------------------------------------------------------------------------------|---|---|---|---|---------|
| Ospina Betancur et al. (2022) | Examines correlation between economic & social growth indicators and energy development in Colombia using multivariate statistical and graphical analysis (dispersion matrices) to reveal structural relationships among variables. | 4 | 4 | 3 | 2 | 13 /20  |
| Mainali & Silveira (2015)     | Developed an Energy Technology Sustainability Index (ETSI) for rural electrification in India using PCA (multivariate index aggregation) across technical, economic, social & environmental criteria.                               | 5 | 5 | 4 | 3 | 17 / 20 |

|                         |                                                                                                                                                                                          |   |   |   |   |         |
|-------------------------|------------------------------------------------------------------------------------------------------------------------------------------------------------------------------------------|---|---|---|---|---------|
| Ordu & Soytaş (2015)    | Analyzed link between energy commodity prices and electricity/market indices in Turkey via time-series econometrics (VAR, Granger causality).                                            | 4 | 5 | 3 | 1 | 13 / 20 |
| Sarkodie & Adams (2020) | Empirical panel analysis (2000–2018) of electricity access, HDI, governance, income inequality in SSA using Driscoll–Kraay regression to address heteroskedasticity and autocorrelation. | 5 | 5 | 5 | 4 | 19 / 20 |

|                                   |                                                                                                                                                                                        |   |   |   |   |         |
|-----------------------------------|----------------------------------------------------------------------------------------------------------------------------------------------------------------------------------------|---|---|---|---|---------|
| Shah et al. (2019)                | Developed a composite Energy Security & Environmental Sustainability Index (ESESI) for South Asia (2006–2017) via normalized MCDA (weighted averaging of energy & climate indicators). | 5 | 5 | 4 | 3 | 17 / 20 |
| Yumashev et al. (2020)            | Cross-country panel examining HDI vs energy consumption and CO <sub>2</sub> via OECD/UN data and regression analysis.                                                                  | 4 | 4 | 3 | 2 | 13 / 20 |
| Zieliński & Jonek-Kowalska (2021) | Investigated CSR impact on profitability of energy companies in Poland using profitability and market indices (2009–2019).                                                             | 4 | 4 | 3 | 2 | 13 / 20 |

|                      |                                                                                                                                                |   |   |   |   |         |
|----------------------|------------------------------------------------------------------------------------------------------------------------------------------------|---|---|---|---|---------|
| Yan et al. (2020)    | Constructed an evaluation index system for China's smart energy-meter industry quality capacity via five-dimensional MCDA with PCA validation. | 5 | 4 | 4 | 3 | 16 / 20 |
| Reyer et al. (2017)  | Comprehensive review of climate-change impacts in LAC using cross-sectoral meta-analysis of economic and environmental indicators.             | 5 | 5 | 4 | 4 | 18 / 20 |
| Konara et al. (2021) | Assesses Sri Lanka's energy transition policy via indicator analysis (linking sustainability and policy benchmarks).                           | 4 | 4 | 3 | 3 | 14 / 20 |

|                      |                                                                                                                                                                                                                 |   |   |   |   |        |
|----------------------|-----------------------------------------------------------------------------------------------------------------------------------------------------------------------------------------------------------------|---|---|---|---|--------|
| Stein (2013)         | Reviews global energy development patterns (1980–2012) linking energy intensity, GDP growth, and environmental stress indicators. Combines cross-country data analysis with trend-based comparative evaluation. | 4 | 5 | 3 | 2 | 14 /20 |
| Doukas et al. (2012) | Develops a multidimensional energy policy index (EPI) integrating efficiency, security, environment, and technology for the EU. Uses Analytic Hierarchy Process (AHP) and expert weighting.                     | 5 | 5 | 4 | 5 | 19 /20 |

|                      |                                                                                                                                                                          |   |   |   |   |         |
|----------------------|--------------------------------------------------------------------------------------------------------------------------------------------------------------------------|---|---|---|---|---------|
| Ediger et al. (2007) | Constructs a Fossil Fuel Sustainability Index (FFSI) combining resource, dependency, and emission indicators for 62 countries. Uses PCA and equal weighting.             | 5 | 5 | 3 | 2 | 15 /20  |
| Falbo et al. (2010)  | Proposes the FAST Index for electricity spot markets using axiomatic index theory and simulation (Germany & Spain). Evaluates robustness vs manipulation and volatility. | 5 | 5 | 4 | 2 | 16 /20  |
| Kılış (2018)         | Benchmarks 18 SEE cities with SDEWES City Index (7 dimensions, 35 indicators) using normalization + Monte-Carlo simulation.                                              | 5 | 5 | 4 | 4 | 18 / 20 |

|                            |                                                                                                                                            |   |   |   |   |         |
|----------------------------|--------------------------------------------------------------------------------------------------------------------------------------------|---|---|---|---|---------|
| Neelawela et al. (2019)    | Creates a Global Electricity Security Index (14 countries × 25 years) combining technical + economic dimensions via composite index model. | 5 | 5 | 4 | 3 | 17 / 20 |
| Neves & Leal (2010)        | Develops a framework of 18 local energy sustainability indicators from literature + pilot municipalities; practical for local planning.    | 5 | 4 | 4 | 5 | 18 / 20 |
| Abu-Rayash & Dincer (2021) | Formulates an Energy Sustainability Index(ESI) = function of security, accessibility, efficiency for 203 countries (1990-2019).            | 5 | 5 | 5 | 4 | 19 / 20 |

|                        |                                                                                                                   |   |   |   |   |         |
|------------------------|-------------------------------------------------------------------------------------------------------------------|---|---|---|---|---------|
| Abubakar et al. (2015) | Evaluates Nigeria's energy-development linkages via composite sustainability indicators (AHP + Entropy).          | 4 | 4 | 3 | 3 | 14 / 20 |
| Brown et al. (2007)    | Analyzes energy security and sustainability nexusthrough historical indicators in U.S. energy policy context.     | 4 | 4 | 3 | 3 | 14 / 20 |
| De Vito et al. (2017)  | Applies Entropy Weight + TOPSIS to rank EU countries on renewable integration and sustainability efficiency.      | 5 | 5 | 4 | 3 | 17 / 20 |
| Huang et al. (2020)    | Constructs a Provincial Energy Transition Index for China using Fuzzy Comprehensive Evaluation & Entropy weights. | 5 | 5 | 4 | 3 | 17 / 20 |

|                                |                                                                                                                                       |   |   |   |   |         |
|--------------------------------|---------------------------------------------------------------------------------------------------------------------------------------|---|---|---|---|---------|
| Iddrisu & Bhattacharyya (2015) | Develops an Energy Development Index for Sub-Saharan Africa using socio-economic and access variables.                                | 5 | 4 | 3 | 4 | 16 / 20 |
| Kemmler & Spreng (2007)        | Proposes an Energy Sustainability Index (ESI) for India balancing equity, security and environmental impact.                          | 5 | 5 | 4 | 3 | 17 / 20 |
| Patlitzianas et al. (2008)     | Constructs a Renewable Energy Readiness Index for Mediterranean countries using multivariate regression and energy policy indicators. | 5 | 4 | 3 | 4 | 16 / 20 |
| Razmjoo et al. (2019)          | Builds a Sustainable Energy Development Index (SEDI) using AHP + Entropy + COPRAS for Iran's energy system.                           | 5 | 5 | 4 | 4 | 18 / 20 |

|                         |                                                                                                                                                 |   |   |   |   |         |
|-------------------------|-------------------------------------------------------------------------------------------------------------------------------------------------|---|---|---|---|---------|
| Salarvand et al. (2010) | Applies TOPSIS to evaluate Iranian provinces' energy efficiency and sustainability performance.                                                 | 5 | 4 | 3 | 2 | 14 / 20 |
| Sharma et al. (2019)    | Evaluates South Asian energy transition readiness using Entropy + Grey Relational Analysis.                                                     | 5 | 4 | 4 | 3 | 16 / 20 |
| Tsai (2010)             | Uses Taiwan Sustainable Development Indicators (TSDI) under a Pressure–State–Response (PSR)framework to assess energy sustainability 2000–2008. | 5 | 5 | 4 | 3 | 17 / 20 |

|                        |                                                                                                                                   |   |   |   |   |         |
|------------------------|-----------------------------------------------------------------------------------------------------------------------------------|---|---|---|---|---------|
| Vera & Langlois (2007) | Develops Energy Indicators for Sustainable Development (EISD) under UN-IAEA framework; global methodological standard.            | 5 | 4 | 5 | 5 | 19 / 20 |
| Wang et al. (2020)     | Introduces Dynamic Energy Security Index (DESI) using Functional Data Analysis + Entropy Weighting to capture temporal evolution. | 5 | 5 | 5 | 4 | 19 / 20 |
| Zhong et al. (2020)    | Constructs a Sustainable Urbanization Index using Entropy + Survey data across 3 Chinese regions (East, Central, West).           | 5 | 4 | 4 | 4 | 17 / 20 |
|                        |                                                                                                                                   |   |   |   |   |         |

|                         |                                                                                                                                                                                          |   |   |   |   |         |
|-------------------------|------------------------------------------------------------------------------------------------------------------------------------------------------------------------------------------|---|---|---|---|---------|
| Mayer et al. (2004)     | Conceptual review of ecological, economic and thermodynamic indices for sustainability; introduces cross-disciplinary taxonomy of indices (e.g., resilience, carrying capacity, exergy). | 5 | 4 | 3 | 4 | 16 / 20 |
| Narula & Reddy (2015)   | Compares three national energy indices (ESI, IIESR, EAPI); evaluates methodological consistency and ranking robustness.                                                                  | 5 | 5 | 4 | 3 | 17 / 20 |
| Romero & Linares (2014) | Systematic review of Exergy as a Global Energy Sustainability Indicator; thermodynamic theoretical synthesis of weak vs strong sustainability frameworks.                                | 5 | 5 | 4 | 3 | 17 / 20 |

|                                |                                                                                                                                   |   |   |   |   |         |
|--------------------------------|-----------------------------------------------------------------------------------------------------------------------------------|---|---|---|---|---------|
| Shortall & Davidsdottir (2017) | National energy-sustainability assessment for Iceland; reviews WEF, WEC and IAEA indices via expert interviews and OECD criteria. | 5 | 4 | 4 | 5 | 18 / 20 |
| Streimikiene & Siksnyte (2016) | Develops Electricity Market Sustainability Index (EMSI) for 12 OECD countries; linear regression and comparative MCDA framework.  | 5 | 5 | 4 | 3 | 17 / 20 |
