# Supplementary material for: Aggregate Sustainability Indices in the Electricity Sector: A Review
Source: Research Square preprint supplement (doi:10.21203/rs.3.rs-7395096/v1), 2025-11-06
Supplement: Supplementary file 3 [file e43881b1b3522278ce1e9a00.pdf]

**Table S2 - Summary of Methodological Characteristics of Composite Sustainability Indices in the Electricity and Energy Sector**

| Author(Year)                         | Category / Focus                                                                | Geography | Scope                                  | Method                                                               | Weighting / Normalization                                                     | Key Indicators Used                                                                   | Key Limitations                                                                                                                       |
|--------------------------------------|---------------------------------------------------------------------------------|-----------|----------------------------------------|----------------------------------------------------------------------|-------------------------------------------------------------------------------|---------------------------------------------------------------------------------------|---------------------------------------------------------------------------------------------------------------------------------------|
| Prokhorova, Budanov & Budanov (2024) | Generalized integrated indicator for energy safety (ZNPP case)                  | Ukraine   | Industrial power-generation enterprise | Indicative analysis + AHP + expert estimation + automated monitoring | Expert weighting; normalization through analytic hierarchy consistency checks | Energy security, reliability, operational risk, staff competency, equipment condition | Limited external data validation; sample restricted to one enterprise (ZNPP); heavy reliance on expert scoring for weight calibration |
| Cavallaro (2015)                     | Fuzzy Environmental Pressure Index (FEPI) for electricity generation            | Italy     | Energy technology-specific             | Mamdani-type Fuzzy Inference System                                  | Linguistic rules; membership-based fuzzification; centroid defuzzification    | Air pollution, radiation, water/soil contamination, health impact                     | Uses qualitative membership functions; lacks empirical calibration with real emission data                                            |
| Qian et al. (2024)                   | EEBD-3ES model – Energy, Economy, Environment, Social impacts of coal reduction | China     | National–provincial level              | Hybrid AHP + Entropy Weight + Scenario Simulation                    | Entropy for data-driven weights; AHP for qualitative adjustment               | Economic output, employment, emissions, social welfare, trade                         | Model complexity and dependence on scenario assumptions; limited sensitivity testing on weight shifts                                 |

|                                    |                                                                   |                |                                                                    |                                                    |                                                            |                                                                     |                                                                                   |
|------------------------------------|-------------------------------------------------------------------|----------------|--------------------------------------------------------------------|----------------------------------------------------|------------------------------------------------------------|---------------------------------------------------------------------|-----------------------------------------------------------------------------------|
| Neofytou, Nikas & Doukas (2020)    | Sustainable Energy Transition Readiness (SETR Index)              | Greece & EU    | Cross-country (14 EU states)                                       | Hybrid PROMETHEE II + AHP                          | AHP for weights; preference functions for ranking          | Governance, innovation, infrastructure, policy, finance, technology | Temporal limitation (single-year data); expert sample size moderate (n≈15)        |
| Raza, Janajreh & Ghenai (2014)     | Sustainability Index for energy storage system selection          | Pakistan / UAE | Technology-level comparison (fuel cell vs Li-polymer vs lead-acid) | Weighted Sum MCDA                                  | Expert-assigned weights; range normalization               | Technical, economic, environmental, and lifecycle                   | Limited indicator breadth (3 techs only); subjective weighting without validation |
| Goldrath, Ayalon & Shechter (2015) | Combined Sustainability Index for electricity efficiency measures | Israel         | National energy efficiency policy                                  | MCDA (five sub-index model)                        | Equal weights; normalized across dimensionless scores      | Economic, environmental, technological, social, political           | Static dataset (single-year snapshot); equal weights not empirically justified    |
| Liu (2014)                         | General Sustainability Indicator (conceptual synthesis + review)  | China          | Global conceptual framework                                        | Literature synthesis + fuzzy AHP conceptualization | Weighted aggregation (illustrative); discusses AHP/entropy | Environmental, economic, social, institutional, technical           | Conceptual—no primary data or model testing; no reproducibility metrics           |
| Wang et al. (2020)                 | Fuzzy evaluation for transition reliability in Integrated         | China          | System-level (IES)                                                 | Multi-level Fuzzy Comprehensive Evaluation         | Combined empowerment (AHP + Entropy)                       | Reliability, economy, environment, safety                           | Case-specific data from one IES; no comparative benchmark validation              |

|                                   |                                                     |                            |                                                                                         |                                                                      |                                                                                                      |                                                                                                                                                                                       |                                                                                                                            |
|-----------------------------------|-----------------------------------------------------|----------------------------|-----------------------------------------------------------------------------------------|----------------------------------------------------------------------|------------------------------------------------------------------------------------------------------|---------------------------------------------------------------------------------------------------------------------------------------------------------------------------------------|----------------------------------------------------------------------------------------------------------------------------|
|                                   | Energy Systems (IES)                                |                            |                                                                                         |                                                                      |                                                                                                      |                                                                                                                                                                                       |                                                                                                                            |
| Wu et al. (2021)                  | Low-carbon transition performance assessment        | China                      | Regional / national                                                                     | Improved TOPSIS + Entropy                                            | Entropy-based objective weights; Euclidean normalization                                             | Carbon intensity, renewable share, GDP, energy efficiency                                                                                                                             | Uses annual cross-sectional data; no stakeholder verification                                                              |
| Raza et al. (2014, early version) | Preliminary sustainability index for energy storage | UAE                        | Technological prototype                                                                 | Weighted Sum MCDA                                                    | Equal weighting (pilot model)                                                                        | Technical, cost, and environmental                                                                                                                                                    | Prototype iteration without peer benchmarking; lacks uncertainty treatment                                                 |
| Afgan (2010)                      | Conceptual / Framework                              | Europe (EU energy systems) | Conceptual design of Intelligent Energy Systems using ICT for sustainability assessment | MCDA (Multi-criteria Decision Analysis) with additive weighted index | Weighted arithmetic mean; normalization of multi-dimensional indices; fuzzy set membership functions | Economic (Investment, O&M, Electricity cost), Environmental (CO <sub>2</sub> , Air pollution, Particulates), Social (Acceptability, Job creation), Resource (Material use, Recycling) | No empirical data validation; limited stakeholder participation; theoretical model only; assumes perfect data availability |

|                           |                                                                             |                 |                                                                |                                                     |                                                                                                          |                                                                                                                                                                                                  |                                                                                                                                    |
|---------------------------|-----------------------------------------------------------------------------|-----------------|----------------------------------------------------------------|-----------------------------------------------------|----------------------------------------------------------------------------------------------------------|--------------------------------------------------------------------------------------------------------------------------------------------------------------------------------------------------|------------------------------------------------------------------------------------------------------------------------------------|
| Cucchiella et al. (2017)  | Quantitative / Empirical                                                    | 28 EU countries | Country-level sustainability benchmarking (Environment Energy) | AHP + MCDA + hybridizing Eurostat datasets          | Pairwise comparison matrix normalized (Saaty scale); CR<0.1 ensures consistency                          | 9 indicators: GHG emissions, Government Env. Expenditure, Recycled WEEEs, Recycled ELVs, Recycled MSW, Renewable share (electricity, transport, heating), Primary Energy Efficiency              | Limited to environmental and energy pillars (no social/economic); snapshot year (2013); relies on expert survey consistency        |
| Torul Yürek et al. (2024) | Multi-objective optimization of national energy system with battery storage | Turkey          | National-level planning (2022–2030)                            | MOLP + Pythagorean Fuzzy AHP–TOPSIS integrated MCDM | AHP-derived weights for criteria; entropy consistency within fuzzy set; normalization via linear scaling | 4 criteria (Economic, Technological, Social, Environmental); Sub-indices: Sustainability Index (SI), Socio-Political Index (SPI), Cost/LCOE, Emission reduction, Job creation, Policy incentives | SI and SPI partially rely on expert judgment from earlier models; limited stakeholder diversity; short-term projection (2022–2030) |

|                                                                      |                                                                    |                    |                                                   |                                                                                        |                                                           |                                                                                                                               |                                                                                                   |
|----------------------------------------------------------------------|--------------------------------------------------------------------|--------------------|---------------------------------------------------|----------------------------------------------------------------------------------------|-----------------------------------------------------------|-------------------------------------------------------------------------------------------------------------------------------|---------------------------------------------------------------------------------------------------|
| Ospina Betancur et al. (2022)                                        | Relationship between economic/social growth and energy development | Colombia           | National macroeconomic                            | Multivariate statistical analysis (correlation, dispersion matrices, pictorial graphs) | Standardization for variance control; no weighting scheme | Economic (GDP, industry, consumption), Social (employment, education, life quality), Energy (generation, access, consumption) | Purely correlational; lacks predictive modeling or index aggregation; single-year cross-sectional |
| Mainali & Silveira (2015) Mainali Silveira Using a Sustainability... | Sustainability index for rural electrification technologies        | India              | Techno-socio comparison of 10 systems (2005–2015) | PCA-based ETSI composite index                                                         | Z-score standardization + principal components weight     | Economic (cost, efficiency), Social (job creation, acceptance), Environmental (emissions)                                     | Static index (no dynamic interactions); expert validation limited                                 |
| Ordu & Soytaş (2015) ordu2015                                        | Energy commodity–market interaction                                | Turkey             | Pre/post-2008 financial crisis                    | VAR & Granger causality                                                                | Log-normalized returns                                    | Oil, Gas, Electricity prices vs stock indices                                                                                 | No sustainability dimension; short sample period                                                  |
| Sarkodie & Adams (2020) Sarkodie                                     | Electricity access vs HDI and inequality                           | Sub-Saharan Africa | 26 countries (2000–2018)                          | Driscoll–Kraay panel regression                                                        | Cross-country normalization of HDI & access indices       | Electricity access, Governance, Inequality, HDI                                                                               | Limited qualitative stakeholder data                                                              |
| Shah et al. (2019) shah2019                                          | Energy Security + Environmental Sustainability Index (ESESI)       | South Asia         | 8 countries (2006–2017)                           | Composite MCDA                                                                         | Min–max normalization + equal weights                     | Energy imports, RES share, CO <sub>2</sub> , efficiency                                                                       | Equal weight bias; no economic pillar                                                             |

|                                                            |                                                                          |                                 |                                      |                                                    |                                |                                                     |                                                   |
|------------------------------------------------------------|--------------------------------------------------------------------------|---------------------------------|--------------------------------------|----------------------------------------------------|--------------------------------|-----------------------------------------------------|---------------------------------------------------|
| Yumashev et al.<br>(2020)Yumash<br>ev 2020                 | HDI vs<br>energy<br>consumption<br>and CO <sub>2</sub>                   | Global<br>(UN/OECD<br>dataset)  | Cross-country<br>macro study         | Econometric<br>regression                          | PPP adjustment                 | HDI, GDP, CO <sub>2</sub> , energy<br>share         | No MCDA or weighting<br>structure                 |
| Zieliński &<br>Jonek-Kowals<br>ka<br>(2021)Zielink<br>siii | CSR vs<br>profitability<br>in energy<br>companies                        | Poland                          | Firm-level<br>(2009–2019)            | Descriptive<br>comparative<br>financial analysis + | Ratio normalization            | ROA, ROE, EPS, CSR<br>index membership              | CSR definition narrow<br>(only stock index)       |
| Yan et al.<br>(2020)yan202<br>0                            | Industrial<br>quality<br>capacity<br>index for<br>smart energy<br>meters | China                           | Sectoral (technical<br>benchmarking) | MCDA + PCA<br>verification                         | Principal component<br>weights | Standardization,<br>inspection, metrology,<br>R&D   | Industrial scope only; no<br>social context       |
| Reyer et al.<br>(2017)Stein<br>2013                        | Climate<br>change<br>impact<br>meta-assess<br>ment                       | Latin<br>America &<br>Caribbean | Regional<br>multi-sectoral           | Meta-analysis of<br>model outputs                  | Comparative<br>normalization   | GDP loss, temperature,<br>agriculture, water stress | Synthesizes secondary<br>data; not original index |
| Konara et al.<br>(2021)                                    | Energy<br>transition<br>policy<br>evaluation                             | Sri Lanka                       | National contextual<br>study         | Indicative<br>framework<br>analysis                | Qualitative scoring            | Renewable target, policy<br>readiness               | Limited quantitative<br>validation                |

|                         |                                                     |                               |                                           |                                                                       |                                                |                                                                                               |                                                                                                  |
|-------------------------|-----------------------------------------------------|-------------------------------|-------------------------------------------|-----------------------------------------------------------------------|------------------------------------------------|-----------------------------------------------------------------------------------------------|--------------------------------------------------------------------------------------------------|
| Stein (2013)            | Global energy development and sustainability trends | Global                        | 120 countries (1980–2012)                 | Comparative quantitative trend analysis + macro-indicator correlation | Normalized by GDP and population; no weighting | Energy intensity, CO <sub>2</sub> per capita, renewable share, GDP growth, electricity access | No formal index; lacks normalization across sustainability pillars; limited statistical modeling |
| Doukas et al. (2012)    | EU Energy Policy Index                              | EU-27                         | Policy performance of member states       | MCDA (AHP + expert scoring)                                           | Expert weights; normalization [0–1]            | Efficiency, environment, tech readiness, security                                             | Subjectivity in expert weights; limited temporal data                                            |
| Ediger et al. (2007)    | Fossil Fuel Sustainability Index (FFSI)             | Global (62 countries)         | Fossil fuel dependency and sustainability | Composite index, PCA weighting                                        | Equal & PCA weights; 0–1 scaling               | R/P ratio, P/C ratio, CO <sub>2</sub> intensity                                               | Lacks socio-economic context; only fossil metrics                                                |
| Falbo et al. (2010)     | Electricity Market Index (FAST)                     | Spain & Germany               | Electricity spot price dynamics           | Quantitative simulation, Axiomatic Index Theory                       | Weighted averages vs axiomatic structure       | Price volatility, market manipulation risk, hedging efficiency                                | Not a sustainability index; no environmental dimension                                           |
| Kılıkış (2018)          | Urban sustainability benchmarking (SDEWES Index)    | South-East Europe (18 cities) | City systems – energy, water, environment | MCDA + Monte Carlo Simulation                                         | Normalized (0–5 scale); equal weights          | 35 indicators across 7 dimensions (energy, water, waste, air, transport, governance, economy) | Data availability heterogeneity across cities                                                    |
| Neelawela et al. (2019) | Electricity security index                          | Global (14 countries)         | 25-year historical analysis               | Composite Index Construction                                          | Entropy weight + Normalization (0–1)           | Affordability, reliability, efficiency, environmental impact                                  | Small sample of countries limits global representativeness                                       |

|                                |                                      |                        |                               |                                           |                                       |                                                                  |                                                |
|--------------------------------|--------------------------------------|------------------------|-------------------------------|-------------------------------------------|---------------------------------------|------------------------------------------------------------------|------------------------------------------------|
| Neves & Leal (2010)            | Local energy sustainability planning | Portugal (EU case)     | Municipal energy plans        | Indicator framework + pilot testing       | Equal weights; normalized scale       | 18 indicators – supply mix, CO <sub>2</sub> , efficiency, access | No quantitative aggregation or composite score |
| Abu-Rayash & Dincer (2021)     | Energy sustainability and resilience | Global (203 countries) | 1990-2019 panel analysis      | MCDA + Entropy Weight + Index Aggregation | Normalized to [0, 1]; entropy weights | Energy security, efficiency, access, renewables                  | Does not fully capture institutional stability |
| Abubakar et al. (2015)         | Energy and development index         | Nigeria                | National                      | AHP + Entropy Hybrid MCDA                 | Weighted sum (0–1)                    | Energy use, GDP growth, social development                       | Small data sample; expert bias in AHP          |
| Brown et al. (2007)            | Energy security evolution            | USA                    | National policy framework     | Indicator trend analysis                  | Normalized trends                     | Availability, affordability, efficiency, environment             | Descriptive; no composite aggregation          |
| De Vito et al. (2017)          | Renewable integration efficiency     | EU-28                  | National energy performance   | Entropy Weight + TOPSIS                   | Entropy weights; Euclidean distance   | Renewables share, emissions, cost, innovation                    | Static snapshot; lacks long-term validation    |
| Huang et al. (2020)            | Provincial energy transition index   | China (31 provinces)   | Regional transition readiness | Fuzzy Comprehensive Evaluation            | Entropy weights + Fuzzy membership    | Economic, technical, environmental dimensions                    | Subjectivity in fuzzy membership grading       |
| Iddrisu & Bhattacharyya (2015) | Energy development index             | Sub-Saharan Africa     | National                      | Composite indicator method                | Equal weights (0–1 scaling)           | Electricity access, per capita use, CO <sub>2</sub>              | Missing data for rural areas                   |
| Kemmler & Spreng (2007)        | Energy sustainability index          | India                  | National energy system        | MCDA + Indicator Normalization            | Equal weights (0–1 scale)             | Equity, security, environment                                    | No time-series updating mechanism              |



|                            |                                               |                    |                                     |                                         |                                                  |                                                            |                                                   |
|----------------------------|-----------------------------------------------|--------------------|-------------------------------------|-----------------------------------------|--------------------------------------------------|------------------------------------------------------------|---------------------------------------------------|
| Patlitzianas et al. (2008) | Renewable energy readiness index              | Mediterranean / EU | Policy and infrastructure readiness | Regression + Policy indicator scoring   | Normalization to [0–1]; regression-based weights | Policy, investment, R&D, renewable share                   | Data comparability limits cross-country synthesis |
| Razmjoo et al. (2019)      | Sustainable Energy Development Index (SEDI)   | Iran               | National energy sustainability      | AHP + Entropy + COPRAS                  | Hybrid weighting; normalized 0–1                 | Economic, environmental, technical, policy                 | Limited to national context                       |
| Salarvand et al. (2010)    | Provincial energy sustainability ranking      | Iran (regional)    | Sub-national                        | TOPSIS (MCDA)                           | Distance-based normalization                     | Efficiency, energy intensity, access                       | Static, lacks temporal dynamics                   |
| Sharma et al. (2019)       | Energy transition readiness                   | South Asia         | Regional                            | Entropy + Grey Relational Analysis      | Entropy weights; grey normalization              | Energy access, renewables, cost, emissions                 | Minimal qualitative stakeholder engagement        |
| Tsai (2010)                | Energy sustainability via national indicators | Taiwan             | National                            | PSR framework + Weighted sum            | Weighted aggregation; PSR-based normalization    | Supply, consumption, CO <sub>2</sub> emissions, renewables | Only two explicit energy indicators in TSDI       |
| Vera & Langlois (2007)     | UN energy sustainability framework            | Global             | Methodological template             | Indicator development & standardization | None (conceptual benchmark)                      | Accessibility, efficiency, environment, affordability      | No empirical case data                            |
| Wang et al. (2020)         | Dynamic energy security                       | China              | National time-series (1990–2017)    | Functional Data Analysis + Entropy      | Dynamic functional weighting                     | Energy supply, consumption, environmental                  | Complexity limits replication                     |

|                                |                                                                                          |                             |                                                    |                                                |                                              |                                                          |                                           |
|--------------------------------|------------------------------------------------------------------------------------------|-----------------------------|----------------------------------------------------|------------------------------------------------|----------------------------------------------|----------------------------------------------------------|-------------------------------------------|
|                                | index (DESI)                                                                             |                             |                                                    |                                                |                                              |                                                          |                                           |
| Zhong et al. (2020)            | Sustainable urbanization index                                                           | China (East, Central, West) | Urbanization & regional disparities                | Entropy weighting + Survey analysis            | Entropy-based weights; standardized z-scores | Economic, social, ecological, rural-urban heterogeneity  | Survey biases; administrative disparities |
| Mayer et al. (2004)            | Multidisciplinary review of sustainability indices (ecological, economic, thermodynamic) | Global conceptual           | Cross-disciplinary taxonomy of indices             | Narrative review + comparative framework       | N/A                                          | Resilience, carrying capacity, green income, exergy      | No empirical data; purely conceptual      |
| Narula & Reddy (2015)          | Comparison of energy security and sustainability indices                                 | Global (100+ countries)     | Benchmark index comparison                         | Indicator decomposition & correlation analysis | Normalization (0–1), rank aggregation        | ESI, IIESR, EAPI country scores                          | Dependent on secondary datasets           |
| Romero & Linares (2014)        | Exergy-based sustainability indicator framework                                          | Global conceptual           | Energy system efficiency and thermodynamic balance | Systematic review + theoretical model          | N/A (thermodynamic ratios)                   | Physical & chemical exergy, irreversibility loss         | Difficult to operationalize for policy    |
| Shortall & Davidsdottir (2017) | National energy sustainability                                                           | Iceland                     | National policy assessment                         | Expert interviews + comparative index analysis | Qualitative scoring vs OECD/IISD criteria    | Affordability, equity, environment, efficiency, security | Limited quantitative data integration     |

|                                        |                                             |                      |                                                               |                                            |                                                |                                                                            |                      |
|----------------------------------------|---------------------------------------------|----------------------|---------------------------------------------------------------|--------------------------------------------|------------------------------------------------|----------------------------------------------------------------------------|----------------------|
|                                        | y<br>performance                            |                      |                                                               |                                            |                                                |                                                                            |                      |
| Streimikiene<br>& Siksnylyte<br>(2016) | Electricity<br>market<br>sustainabilit<br>y | 12 OECD<br>countries | Market<br>liberalization and<br>sustainability<br>performance | Linear regression<br>+ comparative<br>MCDA | Weighted scoring<br>(Economic/Social/Env<br>.) | Affordability,<br>competitiveness,<br>intensity, equity<br>CO <sub>2</sub> | Static year snapshot |
